# Supplementary material for: A novel mariner-based transposon system for the enhanced removal of high strength ammoniacal nitrogen in pharmaceutical effluents
Source: Royal Society of Chemistry journal article supplement (doi:10.1039/c5ra26423e), 2015-12-18
Supplement: c5ra26423e1.pdf [file c5ra26423e1.pdf]

## Supplementary file

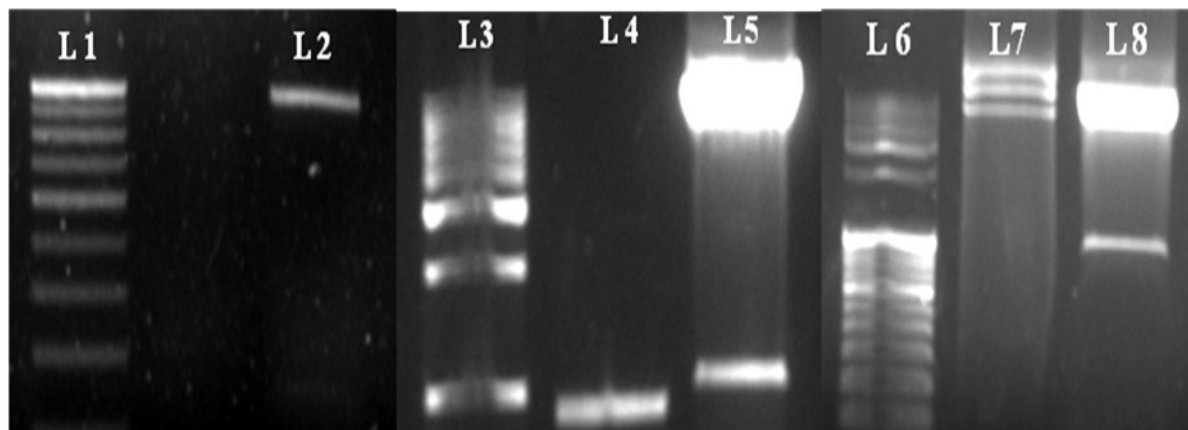

**Fig. 1. Construction of pSC189::miniTn(*Gm*)**

L1: 100bp ladder

L2: Amplified  $Gm^r$  gene from pGP-Tn7-*Gm* (900bp)

L3: 1kb ladder

L4: PCR product digested using RsrII and XhoI (900bp)

L5: pSC189 digested using RsrII and XhoI (release of 1024bp Kan<sup>R</sup> gene)

L6: 1kb and 100bp ladder (mixed)

L7: Purified plasmid - pSC189::miniTn(*Gm*)

L8: Digested pSC189::miniTn(*Gm*) using XhoI and RsrII (release of 900bp  $Gm^r$  gene)

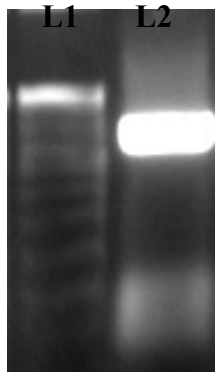

**Fig. 2. PCR confirmation of mutant stability**

L1: 100 bp ladder

L2: R6K amplification from transconjugants
